# Supplementary material for: Prototype of running clinical trials in an untrustworthy environment using blockchain
Source: PubMed Central journal article supplement (PMC6384889; doi:10.1038/s41467-019-08874-y), 2019-02-22
Supplement: 41467_2019_8874_MOESM1_ESM.pdf [file 41467_2019_8874_MOESM1_ESM.pdf]

1 **Supplementary Information**

2 **Wong et al.**

3 The following document contains all of the supplementary information and data for the paper:  
4 *Prototype of Running Clinical Trials in an Untrustworthy Environment Using Blockchain*. A  
5 brief table of contents is below.

6

| 7 <b>Section</b>            | 8 <b>Page Number</b> |
|-----------------------------|----------------------|
| 9 Supplementary Methods     | 2                    |
| 10 Supplementary Discussion | 3                    |
| 11 Supplementary Tables     | 4                    |
| 12 Supplementary Notes      | 5                    |
| 13     Supplementary Note 1 | 5                    |
| 14     Supplementary Note 2 | 12                   |
| 15     Supplementary Note 3 | 19                   |
| 16     Supplementary Note 4 | 23                   |

17  
18  
19  
20  
21  
22  
23  
24  
25  
26  
27  
28  
29  
30  
31

32 **Supplementary Methods**

33 The blockchain in this simulation exists as multiple copies in one physical location on one  
34 machine (see README on GitHub: <https://github.com/wongdaniel8/ClinicalTrials/>). In reality,  
35 the blockchain will be duplicated and stored on multiple different machines, all controlled by the  
36 regulator, so that if one machine fails or is corrupted, the network data is not jeopardized. The  
37 true data and hash values will be reached by consensus of the different machines, such that each  
38 machine will cast a vote on what the hash values of particular articles of data should be. The  
39 majority vote consensus hash will be taken as the true value. When new transactions are added  
40 on the clinical network, the transactions will be appended to each blockchain on each physically  
41 separated machine. This schema will appropriately guard against the compromise or failure of  
42 individual machines, given enough machines are used in data storage and no more than half of  
43 them are compromised. When validating a blockchain, hash checks are performed  
44 chronologically from the genesis block. All elements of the block are hashed using SHA256, and  
45 this hash string is compared to the ground truth hash that is reached by consensus.

46  
47  
48  
49  
50  
51  
52  
53  
54  
55  
56  
57  
58  
59  
60  
61  
62

## 63 **Supplementary Discussion**

64 This scheme, if taken from the current proof of concept prototype to a fully functional service,  
65 also has the potential to meet scalability needs as more machines and more memory to these  
66 machines will be added as needed. With the advent of massive cloud storage, space availability  
67 is not an issue, and runtime is still linear in the amount of data on a trial's blockchain. Elements  
68 such as timestamp, sender and receiver identities, and hashes, all of which are small string  
69 literals, add a negligible fixed-size burden ( $k$  bytes) to the memory allocation requirements per  
70 entry. More formally, given a memory burden of  $n$  bytes for all files stored on the chain with  $m$   
71 number of machines, the system requires  $n + k$  bytes duplicated across  $m$  machines, or  $m(n + k)$   
72 memory allocation, which is bounded by  $O(n)$ , and hence linearly scalable. Performance is also  
73 linear. Checking for cryptographic hash equivalence is simply a string matching test of fixed  
74 length strings returned from SHA256, which is hence bounded by a constant runtime of  $O(I)$ .  
75 When constructing a hash of a file, we must inspect all elements of the data to create the hash  
76 string, which is an  $O(n)$  operation. Version controlling is fast and scalable, because checking if  
77 any two files differ simply requires checking for hash string equivalence, which is an  $O(I)$   
78 operation. Since both memory and performance are bounded linearly, we advocate that pushing  
79 the proof of concept to full production is feasible and practical, especially given the advances in  
80 high performance computing and storage. With favorable linear bounds in place, congestion of  
81 the system through increased traffic is not an issue and performance velocity can be maintained.

82

83 Instantiating a new blockchain for a new trial is relatively simple and executed by the  
84 administrator in charge of the trialchain service. The administrator can instantiate the regulator  
85 node and all nodes in the network specified by the regulator, as is the case in private blockchains.  
86 The regulator is given full read privileges, and instantiating this super node is the same as  
87 instantiating all other nodes, just changing the specific user's privileges. Validating the user  
88 privileges and giving more or less access depending on identity is accomplished through logic in  
89 the software that is executed automatically. Full implementation of logic can be found in the  
90 GitHub repository.

91

92

93

94 **Supplementary Tables**

95

| Subject Accession | Arm Accession | Verification Code |
|-------------------|---------------|-------------------|
| SUB73443          | ARM2          | c6f35fe423        |
| SUB73452          | ARM1          | ed01da9a83        |
| SUB73491          | ARM3          | 741be0d4c0        |
| SUB73511          | ARM4          | d3feabcf82        |

96

97

*Supplementary Table 1: Subject Arm and Codes*

98

| Arm Accession | Description                                                                    | Name                                        |
|---------------|--------------------------------------------------------------------------------|---------------------------------------------|
| ARM1          | Placebo omalizumab pre-treatment, placebo RIT, placebo omalizumab + placebo IT | Placebo Immunotherapy with placebo anti-IgE |
| ARM2          | Placebo omalizumab pre-treatment, ragweed RIT, placebo omalizumab + ragweed IT | Immunotherapy with placebo anti-IgE         |
| ARM3          | Omalizumab pre-treatment, placebo RIT, omalizumab + placebo IT                 | Placebo Immunotherapy with anti-IgE         |
| ARM4          | Omalizumab pre-treatment, ragweed RIT, omalizumab + ragweed IT                 | Immunotherapy with anti-IgE                 |

99

100

*Supplementary Table 2: Arm Description*

101

102

103

104

105

106

107

108

109

110

111

112

113

114 **Supplementary Notes**

115 **Supplementary Note 1**

116 The following section contains example CRF data extracted from ImmPort.

117 Subject: SUB73491

118 verification code: 741be0d4c0

119 Meta Information

120 race: Black or African American

121 gender: Male

122 age\_reported: 28

123 arm\_accession: ARM3

124 Blood Tests

125 ('study\_time\_collected: -20 Days', 'name\_reported: MCV', 'result\_value\_reported: 90',  
126 'result\_unit\_reported: um\*3')

127 ('study\_time\_collected: -20 Days', 'name\_reported: WBC', 'result\_value\_reported: 7.2',  
128 'result\_unit\_reported: 10\*3 cells/uL')

129 ('study\_time\_collected: -20 Days', 'name\_reported: MONOCYTES',  
130 'result\_value\_reported: 5.4', 'result\_unit\_reported: %')

131 ('study\_time\_collected: -20 Days', 'name\_reported: MCHC', 'result\_value\_reported: 34',  
132 'result\_unit\_reported: %')

133 ('study\_time\_collected: -20 Days', 'name\_reported: RBC', 'result\_value\_reported: 4.71',  
134 'result\_unit\_reported: 10\*6 cells/uL')

135 ('study\_time\_collected: -20 Days', 'name\_reported: BASOPHILS', 'result\_value\_reported:  
136 0.2', 'result\_unit\_reported: %')

137 ('study\_time\_collected: -20 Days', 'name\_reported: MCH', 'result\_value\_reported: 30',  
138 'result\_unit\_reported: %')

139 ('study\_time\_collected: -20 Days', 'name\_reported: Total IgE', 'result\_value\_reported: 34',  
140 'result\_unit\_reported: unknown')

141 ('study\_time\_collected: -20 Days', 'name\_reported: HEMOGLOBIN',  
142 'result\_value\_reported: 14.1', 'result\_unit\_reported: g/dL')

143 ('study\_time\_collected: -20 Days', 'name\_reported: SEGMENTED NEUTROPHILS',  
144 'result\_value\_reported: 52.7', 'result\_unit\_reported: %')

145 ('study\_time\_collected: -20 Days', 'name\_reported: LYMPHOCYTES',  
146 'result\_value\_reported: 37.1', 'result\_unit\_reported: %')

147 ('study\_time\_collected: -20 Days', 'name\_reported: HEMATOCRIT',  
148 'result\_value\_reported: 42', 'result\_unit\_reported: %')

149 ('study\_time\_collected: -20 Days', 'name\_reported: LARGE UNCLASSIFIED CELLS',  
150 'result\_value\_reported: 3.4', 'result\_unit\_reported: NULL')

151 ('study\_time\_collected: -20 Days', 'name\_reported: EOSINOPHILS',  
152 'result\_value\_reported: 1.7', 'result\_unit\_reported: %')

153 ('study\_time\_collected: -20 Days', 'name\_reported: PLATELET COUNT',  
154 'result\_value\_reported: 194', 'result\_unit\_reported: 10\*3 cells/uL')

155 ('study\_time\_collected: 0 Days', 'name\_reported: EOSINOPHILS',  
156 'result\_value\_reported: 4.6', 'result\_unit\_reported: %')

157 ('study\_time\_collected: 0 Days', 'name\_reported: RBC', 'result\_value\_reported: 4.45',  
158 'result\_unit\_reported: 10\*6 cells/uL')

159 ('study\_time\_collected: 0 Days', 'name\_reported: PLATELET COUNT',  
 160 'result\_value\_reported: 223', 'result\_unit\_reported: 10\*3 cells/uL')  
 161 ('study\_time\_collected: 0 Days', 'name\_reported: HEMATOCRIT',  
 162 'result\_value\_reported: 41', 'result\_unit\_reported: %')  
 163 ('study\_time\_collected: 0 Days', 'name\_reported: MCV', 'result\_value\_reported: 92',  
 164 'result\_unit\_reported: um\*3')  
 165 ('study\_time\_collected: 0 Days', 'name\_reported: MCHC', 'result\_value\_reported: 33',  
 166 'result\_unit\_reported: %')  
 167 ('study\_time\_collected: 0 Days', 'name\_reported: BASOPHILS', 'result\_value\_reported:  
 168 0.4', 'result\_unit\_reported: %')  
 169 ('study\_time\_collected: 0 Days', 'name\_reported: HEMOGLOBIN',  
 170 'result\_value\_reported: 13.5', 'result\_unit\_reported: g/dL')  
 171 ('study\_time\_collected: 0 Days', 'name\_reported: MCH', 'result\_value\_reported: 30',  
 172 'result\_unit\_reported: %')  
 173 ('study\_time\_collected: 0 Days', 'name\_reported: MONOCYTES', 'result\_value\_reported:  
 174 6.6', 'result\_unit\_reported: %')  
 175 ('study\_time\_collected: 0 Days', 'name\_reported: LYMPHOCYTES',  
 176 'result\_value\_reported: 41.2', 'result\_unit\_reported: %')  
 177 ('study\_time\_collected: 0 Days', 'name\_reported: WBC', 'result\_value\_reported: 5.9',  
 178 'result\_unit\_reported: 10\*3 cells/uL')  
 179 ('study\_time\_collected: 0 Days', 'name\_reported: BANDS', 'result\_value\_reported: 0',  
 180 'result\_unit\_reported: %')  
 181 ('study\_time\_collected: 0 Days', 'name\_reported: SEGMENTED NEUTROPHILS',  
 182 'result\_value\_reported: 44.4', 'result\_unit\_reported: %')  
 183 ('study\_time\_collected: 0 Days', 'name\_reported: LARGE UNCLASSIFIED CELLS',  
 184 'result\_value\_reported: 2.8', 'result\_unit\_reported: NULL')  
 185 ('study\_time\_collected: 119 Days', 'name\_reported: LYMPHOCYTES',  
 186 'result\_value\_reported: 38.1', 'result\_unit\_reported: %')  
 187 ('study\_time\_collected: 119 Days', 'name\_reported: WBC', 'result\_value\_reported: 5.4',  
 188 'result\_unit\_reported: 10\*3 cells/uL')  
 189 ('study\_time\_collected: 119 Days', 'name\_reported: RBC', 'result\_value\_reported: 4.55',  
 190 'result\_unit\_reported: 10\*6 cells/uL')  
 191 ('study\_time\_collected: 119 Days', 'name\_reported: MCHC', 'result\_value\_reported: 34',  
 192 'result\_unit\_reported: %')  
 193 ('study\_time\_collected: 119 Days', 'name\_reported: MCV', 'result\_value\_reported: 88',  
 194 'result\_unit\_reported: um\*3')  
 195 ('study\_time\_collected: 119 Days', 'name\_reported: PLATELET COUNT',  
 196 'result\_value\_reported: 189', 'result\_unit\_reported: 10\*3 cells/uL')  
 197 ('study\_time\_collected: 119 Days', 'name\_reported: SEGMENTED NEUTROPHILS',  
 198 'result\_value\_reported: 50.2', 'result\_unit\_reported: %')  
 199 ('study\_time\_collected: 119 Days', 'name\_reported: MONOCYTES',  
 200 'result\_value\_reported: 6.2', 'result\_unit\_reported: %')  
 201 ('study\_time\_collected: 119 Days', 'name\_reported: HEMOGLOBIN',  
 202 'result\_value\_reported: 13.7', 'result\_unit\_reported: g/dL')  
 203 ('study\_time\_collected: 119 Days', 'name\_reported: EOSINOPHILS',  
 204 'result\_value\_reported: 2.4', 'result\_unit\_reported: %')

205 ('study\_time\_collected: 119 Days', 'name\_reported: LARGE UNCLASSIFIED CELLS',  
 206 'result\_value\_reported: 2.6', 'result\_unit\_reported: NULL')  
 207 ('study\_time\_collected: 119 Days', 'name\_reported: MCH', 'result\_value\_reported: 30',  
 208 'result\_unit\_reported: %')  
 209 ('study\_time\_collected: 119 Days', 'name\_reported: BASOPHILS',  
 210 'result\_value\_reported: 0.5', 'result\_unit\_reported: %')  
 211 ('study\_time\_collected: 119 Days', 'name\_reported: HEMATOCRIT',  
 212 'result\_value\_reported: 40', 'result\_unit\_reported: %')  
 213 ('study\_time\_collected: 147 Days', 'name\_reported: MCH', 'result\_value\_reported: 30',  
 214 'result\_unit\_reported: %')  
 215 ('study\_time\_collected: 147 Days', 'name\_reported: HEMOGLOBIN',  
 216 'result\_value\_reported: 13.7', 'result\_unit\_reported: g/dL')  
 217 ('study\_time\_collected: 147 Days', 'name\_reported: HEMATOCRIT',  
 218 'result\_value\_reported: 41', 'result\_unit\_reported: %')  
 219 ('study\_time\_collected: 147 Days', 'name\_reported: MCV', 'result\_value\_reported: 90',  
 220 'result\_unit\_reported: um\*3')  
 221 ('study\_time\_collected: 147 Days', 'name\_reported: EOSINOPHILS',  
 222 'result\_value\_reported: 2.6', 'result\_unit\_reported: %')  
 223 ('study\_time\_collected: 147 Days', 'name\_reported: LARGE UNCLASSIFIED CELLS',  
 224 'result\_value\_reported: 2.4', 'result\_unit\_reported: NULL')  
 225 ('study\_time\_collected: 147 Days', 'name\_reported: SEGMENTED NEUTROPHILS',  
 226 'result\_value\_reported: 54.2', 'result\_unit\_reported: %')  
 227 ('study\_time\_collected: 147 Days', 'name\_reported: MONOCYTES',  
 228 'result\_value\_reported: 6.5', 'result\_unit\_reported: %')  
 229 ('study\_time\_collected: 147 Days', 'name\_reported: RBC', 'result\_value\_reported: 4.51',  
 230 'result\_unit\_reported: 10\*6 cells/uL')  
 231 ('study\_time\_collected: 147 Days', 'name\_reported: PLATELET COUNT',  
 232 'result\_value\_reported: 203', 'result\_unit\_reported: 10\*3 cells/uL')  
 233 ('study\_time\_collected: 147 Days', 'name\_reported: WBC', 'result\_value\_reported: 6.9',  
 234 'result\_unit\_reported: 10\*3 cells/uL')  
 235 ('study\_time\_collected: 147 Days', 'name\_reported: LYMPHOCYTES',  
 236 'result\_value\_reported: 34', 'result\_unit\_reported: %')  
 237 ('study\_time\_collected: 147 Days', 'name\_reported: MCHC', 'result\_value\_reported: 34',  
 238 'result\_unit\_reported: %')  
 239 ('study\_time\_collected: 147 Days', 'name\_reported: BASOPHILS',  
 240 'result\_value\_reported: 0.3', 'result\_unit\_reported: %')  
 241 ('study\_time\_collected: 160 Days', 'name\_reported: RBC', 'result\_value\_reported: 4.29',  
 242 'result\_unit\_reported: 10\*6 cells/uL')  
 243 ('study\_time\_collected: 160 Days', 'name\_reported: MONOCYTES',  
 244 'result\_value\_reported: 7.3', 'result\_unit\_reported: %')  
 245 ('study\_time\_collected: 160 Days', 'name\_reported: HEMATOCRIT',  
 246 'result\_value\_reported: 39', 'result\_unit\_reported: %')  
 247 ('study\_time\_collected: 160 Days', 'name\_reported: MCHC', 'result\_value\_reported: 34',  
 248 'result\_unit\_reported: %')  
 249 ('study\_time\_collected: 160 Days', 'name\_reported: LYMPHOCYTES',  
 250 'result\_value\_reported: 37', 'result\_unit\_reported: %')

251 ('study\_time\_collected: 160 Days', 'name\_reported: MCH', 'result\_value\_reported: 31',  
252 'result\_unit\_reported: %')  
253 ('study\_time\_collected: 160 Days', 'name\_reported: HEMOGLOBIN',  
254 'result\_value\_reported: 13.3', 'result\_unit\_reported: g/dL')  
255 ('study\_time\_collected: 160 Days', 'name\_reported: BASOPHILS',  
256 'result\_value\_reported: 0.3', 'result\_unit\_reported: %')  
257 ('study\_time\_collected: 160 Days', 'name\_reported: EOSINOPHILS',  
258 'result\_value\_reported: 2.8', 'result\_unit\_reported: %')  
259 ('study\_time\_collected: 160 Days', 'name\_reported: LARGE UNCLASSIFIED CELLS',  
260 'result\_value\_reported: 2.9', 'result\_unit\_reported: NULL')  
261 ('study\_time\_collected: 160 Days', 'name\_reported: WBC', 'result\_value\_reported: 4.7',  
262 'result\_unit\_reported: 10\*3 cells/uL')  
263 ('study\_time\_collected: 160 Days', 'name\_reported: PLATELET COUNT',  
264 'result\_value\_reported: 198', 'result\_unit\_reported: 10\*3 cells/uL')  
265 ('study\_time\_collected: 160 Days', 'name\_reported: MCV', 'result\_value\_reported: 90',  
266 'result\_unit\_reported: um\*3')  
267 ('study\_time\_collected: 160 Days', 'name\_reported: SEGMENTED NEUTROPHILS',  
268 'result\_value\_reported: 49.7', 'result\_unit\_reported: %')  
269 ('study\_time\_collected: 28 Days', 'name\_reported: WBC', 'result\_value\_reported: 6.2',  
270 'result\_unit\_reported: 10\*3 cells/uL')  
271 ('study\_time\_collected: 28 Days', 'name\_reported: BASOPHILS', 'result\_value\_reported:  
272 0', 'result\_unit\_reported: %')  
273 ('study\_time\_collected: 28 Days', 'name\_reported: BANDS', 'result\_value\_reported: 4',  
274 'result\_unit\_reported: %')  
275 ('study\_time\_collected: 28 Days', 'name\_reported: PLATELET COUNT',  
276 'result\_value\_reported: 235', 'result\_unit\_reported: 10\*3 cells/uL')  
277 ('study\_time\_collected: 28 Days', 'name\_reported: LYMPHOCYTES',  
278 'result\_value\_reported: 49', 'result\_unit\_reported: %')  
279 ('study\_time\_collected: 28 Days', 'name\_reported: MCHC', 'result\_value\_reported: 33',  
280 'result\_unit\_reported: %')  
281 ('study\_time\_collected: 28 Days', 'name\_reported: EOSINOPHILS',  
282 'result\_value\_reported: 0', 'result\_unit\_reported: %')  
283 ('study\_time\_collected: 28 Days', 'name\_reported: SEGMENTED NEUTROPHILS',  
284 'result\_value\_reported: 43', 'result\_unit\_reported: %')  
285 ('study\_time\_collected: 28 Days', 'name\_reported: HEMATOCRIT',  
286 'result\_value\_reported: 43', 'result\_unit\_reported: %')  
287 ('study\_time\_collected: 28 Days', 'name\_reported: MCV', 'result\_value\_reported: 91',  
288 'result\_unit\_reported: um\*3')  
289 ('study\_time\_collected: 28 Days', 'name\_reported: RBC', 'result\_value\_reported: 4.68',  
290 'result\_unit\_reported: 10\*6 cells/uL')  
291 ('study\_time\_collected: 28 Days', 'name\_reported: MCH', 'result\_value\_reported: 30',  
292 'result\_unit\_reported: %')  
293 ('study\_time\_collected: 28 Days', 'name\_reported: HEMOGLOBIN',  
294 'result\_value\_reported: 14.2', 'result\_unit\_reported: g/dL')  
295 ('study\_time\_collected: 28 Days', 'name\_reported: MONOCYTES',  
296 'result\_value\_reported: 4', 'result\_unit\_reported: %')

297 ('study\_time\_collected: 369 Days', 'name\_reported: BASOPHILS',  
 298 'result\_value\_reported: 0.3', 'result\_unit\_reported: %')  
 299 ('study\_time\_collected: 369 Days', 'name\_reported: SEGMENTED NEUTROPHILS',  
 300 'result\_value\_reported: 47.7', 'result\_unit\_reported: %')  
 301 ('study\_time\_collected: 369 Days', 'name\_reported: LYMPHOCYTES',  
 302 'result\_value\_reported: 39.5', 'result\_unit\_reported: %')  
 303 ('study\_time\_collected: 369 Days', 'name\_reported: EOSINOPHILS',  
 304 'result\_value\_reported: 2.3', 'result\_unit\_reported: %')  
 305 ('study\_time\_collected: 369 Days', 'name\_reported: HEMOGLOBIN',  
 306 'result\_value\_reported: 14.4', 'result\_unit\_reported: g/dL')  
 307 ('study\_time\_collected: 369 Days', 'name\_reported: LARGE UNCLASSIFIED CELLS',  
 308 'result\_value\_reported: 2.8', 'result\_unit\_reported: NULL')  
 309 ('study\_time\_collected: 369 Days', 'name\_reported: HEMATOCRIT',  
 310 'result\_value\_reported: 42', 'result\_unit\_reported: %')  
 311 ('study\_time\_collected: 369 Days', 'name\_reported: MCH', 'result\_value\_reported: 31',  
 312 'result\_unit\_reported: %')  
 313 ('study\_time\_collected: 369 Days', 'name\_reported: MONOCYTES',  
 314 'result\_value\_reported: 7.4', 'result\_unit\_reported: %')  
 315 ('study\_time\_collected: 369 Days', 'name\_reported: MCV', 'result\_value\_reported: 91',  
 316 'result\_unit\_reported: um\*3')  
 317 ('study\_time\_collected: 369 Days', 'name\_reported: MCHC', 'result\_value\_reported: 34',  
 318 'result\_unit\_reported: %')  
 319 ('study\_time\_collected: 369 Days', 'name\_reported: RBC', 'result\_value\_reported: 4.62',  
 320 'result\_unit\_reported: 10\*6 cells/uL')  
 321 ('study\_time\_collected: 369 Days', 'name\_reported: WBC', 'result\_value\_reported: 5.2',  
 322 'result\_unit\_reported: 10\*3 cells/uL')  
 323 ('study\_time\_collected: 369 Days', 'name\_reported: PLATELET COUNT',  
 324 'result\_value\_reported: 179', 'result\_unit\_reported: 10\*3 cells/uL')  
 325 ('study\_time\_collected: 56 Days', 'name\_reported: BANDS', 'result\_value\_reported: 1',  
 326 'result\_unit\_reported: %')  
 327 ('study\_time\_collected: 56 Days', 'name\_reported: MCV', 'result\_value\_reported: 90',  
 328 'result\_unit\_reported: um\*3')  
 329 ('study\_time\_collected: 56 Days', 'name\_reported: HEMATOCRIT',  
 330 'result\_value\_reported: 43', 'result\_unit\_reported: %')  
 331 ('study\_time\_collected: 56 Days', 'name\_reported: MONOCYTES',  
 332 'result\_value\_reported: 9', 'result\_unit\_reported: %')  
 333 ('study\_time\_collected: 56 Days', 'name\_reported: HEMOGLOBIN',  
 334 'result\_value\_reported: 14.5', 'result\_unit\_reported: g/dL')  
 335 ('study\_time\_collected: 56 Days', 'name\_reported: BASOPHILS', 'result\_value\_reported:  
 336 0', 'result\_unit\_reported: %')  
 337 ('study\_time\_collected: 56 Days', 'name\_reported: MCHC', 'result\_value\_reported: 34',  
 338 'result\_unit\_reported: %')  
 339 ('study\_time\_collected: 56 Days', 'name\_reported: RBC', 'result\_value\_reported: 4.74',  
 340 'result\_unit\_reported: 10\*6 cells/uL')  
 341 ('study\_time\_collected: 56 Days', 'name\_reported: MCH', 'result\_value\_reported: 31',  
 342 'result\_unit\_reported: %')

343 ('study\_time\_collected: 56 Days', 'name\_reported: LYMPHOCYTES',  
 344 'result\_value\_reported: 51', 'result\_unit\_reported: %')  
 345 ('study\_time\_collected: 56 Days', 'name\_reported: PLATELET COUNT',  
 346 'result\_value\_reported: 221', 'result\_unit\_reported: 10\*3 cells/uL')  
 347 ('study\_time\_collected: 56 Days', 'name\_reported: WBC', 'result\_value\_reported: 6.7',  
 348 'result\_unit\_reported: 10\*3 cells/uL')  
 349 ('study\_time\_collected: 56 Days', 'name\_reported: SEGMENTED NEUTROPHILS',  
 350 'result\_value\_reported: 39', 'result\_unit\_reported: %')  
 351 ('study\_time\_collected: 56 Days', 'name\_reported: EOSINOPHILS',  
 352 'result\_value\_reported: 0', 'result\_unit\_reported: %')  
 353 ('study\_time\_collected: 91 Days', 'name\_reported: BASOPHILS', 'result\_value\_reported:  
 354 0.3', 'result\_unit\_reported: %')  
 355 ('study\_time\_collected: 91 Days', 'name\_reported: LYMPHOCYTES',  
 356 'result\_value\_reported: 30.3', 'result\_unit\_reported: %')  
 357 ('study\_time\_collected: 91 Days', 'name\_reported: PLATELET COUNT',  
 358 'result\_value\_reported: 199', 'result\_unit\_reported: 10\*3 cells/uL')  
 359 ('study\_time\_collected: 91 Days', 'name\_reported: MONOCYTES',  
 360 'result\_value\_reported: 5.5', 'result\_unit\_reported: %')  
 361 ('study\_time\_collected: 91 Days', 'name\_reported: EOSINOPHILS',  
 362 'result\_value\_reported: 1.9', 'result\_unit\_reported: %')  
 363 ('study\_time\_collected: 91 Days', 'name\_reported: SEGMENTED NEUTROPHILS',  
 364 'result\_value\_reported: 59.6', 'result\_unit\_reported: %')  
 365 ('study\_time\_collected: 91 Days', 'name\_reported: MCHC', 'result\_value\_reported: 35',  
 366 'result\_unit\_reported: %')  
 367 ('study\_time\_collected: 91 Days', 'name\_reported: HEMOGLOBIN',  
 368 'result\_value\_reported: 13.8', 'result\_unit\_reported: g/dL')  
 369 ('study\_time\_collected: 91 Days', 'name\_reported: LARGE UNCLASSIFIED CELLS',  
 370 'result\_value\_reported: 2.4', 'result\_unit\_reported: NULL')  
 371 ('study\_time\_collected: 91 Days', 'name\_reported: RBC', 'result\_value\_reported: 4.53',  
 372 'result\_unit\_reported: 10\*6 cells/uL')  
 373 ('study\_time\_collected: 91 Days', 'name\_reported: MCH', 'result\_value\_reported: 30',  
 374 'result\_unit\_reported: %')  
 375 ('study\_time\_collected: 91 Days', 'name\_reported: MCV', 'result\_value\_reported: 88',  
 376 'result\_unit\_reported: um\*3')  
 377 ('study\_time\_collected: 91 Days', 'name\_reported: HEMATOCRIT',  
 378 'result\_value\_reported: 40', 'result\_unit\_reported: %')  
 379 ('study\_time\_collected: 91 Days', 'name\_reported: WBC', 'result\_value\_reported: 6.8',  
 380 'result\_unit\_reported: 10\*3 cells/uL')  
 381  
 382 Assay Measurements  
 383 ('study\_time\_collected: -8', 'analyte: IgE-a Amb a', 'value\_reported: 28.3', 'unit\_reported:  
 384 U/ml')  
 385 ('study\_time\_collected: -8', 'analyte: IgG-a Amb a', 'value\_reported: 43', 'unit\_reported:  
 386 U/ml')  
 387 ('study\_time\_collected: -8', 'analyte: IgE-a Ragweed', 'value\_reported: 1.71',  
 388 'unit\_reported: kIUa/ml')

389 ('study\_time\_collected: -8', 'analyte: Free IgE Concentration', 'value\_reported: 89.92',  
390 'unit\_reported: ng/ml')  
391 ('study\_time\_collected: -8', 'analyte: IgG-a Ragweed', 'value\_reported: 100',  
392 'unit\_reported: ng/ml')  
393 ('study\_time\_collected: 105', 'analyte: IgG-a Amb a', 'value\_reported: 511.5',  
394 'unit\_reported: U/ml')  
395 ('study\_time\_collected: 105', 'analyte: IgE-a Amb a', 'value\_reported: 3340',  
396 'unit\_reported: U/ml')  
397 ('study\_time\_collected: 105', 'analyte: IgE-a Ragweed', 'value\_reported: 71.1',  
398 'unit\_reported: kIUa/ml')  
399 ('study\_time\_collected: 105', 'analyte: Free IgE Concentration', 'value\_reported: 17.376',  
400 'unit\_reported: ng/ml')  
401 ('study\_time\_collected: 105', 'analyte: IgG-a Ragweed', 'value\_reported: 385',  
402 'unit\_reported: ng/ml')  
403 ('study\_time\_collected: 202', 'analyte: Free IgE Concentration', 'value\_reported: 34.303',  
404 'unit\_reported: ng/ml')  
405 ('study\_time\_collected: 202', 'analyte: IgE-a Ragweed', 'value\_reported: 45.6',  
406 'unit\_reported: kIUa/ml')  
407 ('study\_time\_collected: 202', 'analyte: IgG-a Ragweed', 'value\_reported: 377',  
408 'unit\_reported: ng/ml')  
409 ('study\_time\_collected: 202', 'analyte: IgG-a Amb a', 'value\_reported: 398',  
410 'unit\_reported: U/ml')  
411 ('study\_time\_collected: 202', 'analyte: IgE-a Amb a', 'value\_reported: 2195',  
412 'unit\_reported: U/ml')

413  
414 Adverse Reactions  
415 Muscle strain  
416 Injection site swelling  
417 Sinus headache  
418 Insomnia  
419 Nasal congestion  
420 Sinus pain  
421 Sneezing  
422 Throat irritation  
423 Dyspnoea exertional  
424 Blood pressure decreased  
425 Sinus congestion  
426 Myalgia  
427 Abrasion NOS  
428 Tendon injury  
429 Arthralgia  
430 Skin laceration  
431 Influenza  
432  
433

434 **Supplementary Note 2**

435 Subject: SUB73511

436 verification code: d3feabcf82

437 Meta Information

438 race: White

439 gender: Male

440 age\_reported: 45

441 arm\_accession: ARM4

442 Blood Tests

443 ('study\_time\_collected: -15 Days', 'name\_reported: RBC', 'result\_value\_reported: 5.45',  
444 'result\_unit\_reported: 10\*6 cells/uL')

445 ('study\_time\_collected: -15 Days', 'name\_reported: HEMATOCRIT',  
446 'result\_value\_reported: 47', 'result\_unit\_reported: %')

447 ('study\_time\_collected: -15 Days', 'name\_reported: PLATELET COUNT',  
448 'result\_value\_reported: 271', 'result\_unit\_reported: 10\*3 cells/uL')

449 ('study\_time\_collected: -15 Days', 'name\_reported: WBC', 'result\_value\_reported: 6.7',  
450 'result\_unit\_reported: 10\*3 cells/uL')

451 ('study\_time\_collected: -15 Days', 'name\_reported: HEMOGLOBIN',  
452 'result\_value\_reported: 15.8', 'result\_unit\_reported: g/dL')

453 ('study\_time\_collected: -15 Days', 'name\_reported: MCV', 'result\_value\_reported: 86',  
454 'result\_unit\_reported: um\*3')

455 ('study\_time\_collected: -15 Days', 'name\_reported: Total IgE', 'result\_value\_reported: 58',  
456 'result\_unit\_reported: unknown')

457 ('study\_time\_collected: -15 Days', 'name\_reported: MCHC', 'result\_value\_reported: 34',  
458 'result\_unit\_reported: %')

459 ('study\_time\_collected: -15 Days', 'name\_reported: MCH', 'result\_value\_reported: 29',  
460 'result\_unit\_reported: %')

461 ('study\_time\_collected: 0 Days', 'name\_reported: LARGE UNCLASSIFIED CELLS',  
462 'result\_value\_reported: 2.2', 'result\_unit\_reported: NULL')

463 ('study\_time\_collected: 0 Days', 'name\_reported: MONOCYTES', 'result\_value\_reported:  
464 4.5', 'result\_unit\_reported: %')

465 ('study\_time\_collected: 0 Days', 'name\_reported: HEMOGLOBIN',  
466 'result\_value\_reported: 14.8', 'result\_unit\_reported: g/dL')

467 ('study\_time\_collected: 0 Days', 'name\_reported: MCV', 'result\_value\_reported: 87',  
468 'result\_unit\_reported: um\*3')

469 ('study\_time\_collected: 0 Days', 'name\_reported: EOSINOPHILS',  
470 'result\_value\_reported: 1.9', 'result\_unit\_reported: %')

471 ('study\_time\_collected: 0 Days', 'name\_reported: SEGMENTED NEUTROPHILS',  
472 'result\_value\_reported: 56.3', 'result\_unit\_reported: %')

473 ('study\_time\_collected: 0 Days', 'name\_reported: HEMATOCRIT',  
474 'result\_value\_reported: 44', 'result\_unit\_reported: %')

475 ('study\_time\_collected: 0 Days', 'name\_reported: WBC', 'result\_value\_reported: 6.8',  
476 'result\_unit\_reported: 10\*3 cells/uL')

477 ('study\_time\_collected: 0 Days', 'name\_reported: BASOPHILS', 'result\_value\_reported:  
478 0.6', 'result\_unit\_reported: %')

479 ('study\_time\_collected: 0 Days', 'name\_reported: MCH', 'result\_value\_reported: 29',  
 480 'result\_unit\_reported: %')  
 481 ('study\_time\_collected: 0 Days', 'name\_reported: LYMPHOCYTES',  
 482 'result\_value\_reported: 34.5', 'result\_unit\_reported: %')  
 483 ('study\_time\_collected: 0 Days', 'name\_reported: MCHC', 'result\_value\_reported: 34',  
 484 'result\_unit\_reported: %')  
 485 ('study\_time\_collected: 0 Days', 'name\_reported: RBC', 'result\_value\_reported: 5.09',  
 486 'result\_unit\_reported: 10\*6 cells/uL')  
 487 ('study\_time\_collected: 0 Days', 'name\_reported: PLATELET COUNT',  
 488 'result\_value\_reported: 295', 'result\_unit\_reported: 10\*3 cells/uL')  
 489 ('study\_time\_collected: 114 Days', 'name\_reported: LARGE UNCLASSIFIED CELLS',  
 490 'result\_value\_reported: 2.4', 'result\_unit\_reported: NULL')  
 491 ('study\_time\_collected: 114 Days', 'name\_reported: PLATELET COUNT',  
 492 'result\_value\_reported: 278', 'result\_unit\_reported: 10\*3 cells/uL')  
 493 ('study\_time\_collected: 114 Days', 'name\_reported: HEMATOCRIT',  
 494 'result\_value\_reported: 46', 'result\_unit\_reported: %')  
 495 ('study\_time\_collected: 114 Days', 'name\_reported: BASOPHILS',  
 496 'result\_value\_reported: 0.6', 'result\_unit\_reported: %')  
 497 ('study\_time\_collected: 114 Days', 'name\_reported: SEGMENTED NEUTROPHILS',  
 498 'result\_value\_reported: 57.3', 'result\_unit\_reported: %')  
 499 ('study\_time\_collected: 114 Days', 'name\_reported: EOSINOPHILS',  
 500 'result\_value\_reported: 2', 'result\_unit\_reported: %')  
 501 ('study\_time\_collected: 114 Days', 'name\_reported: LYMPHOCYTES',  
 502 'result\_value\_reported: 32.5', 'result\_unit\_reported: %')  
 503 ('study\_time\_collected: 114 Days', 'name\_reported: MCH', 'result\_value\_reported: 29',  
 504 'result\_unit\_reported: %')  
 505 ('study\_time\_collected: 114 Days', 'name\_reported: MCHC', 'result\_value\_reported: 34',  
 506 'result\_unit\_reported: %')  
 507 ('study\_time\_collected: 114 Days', 'name\_reported: WBC', 'result\_value\_reported: 7.3',  
 508 'result\_unit\_reported: 10\*3 cells/uL')  
 509 ('study\_time\_collected: 114 Days', 'name\_reported: MONOCYTES',  
 510 'result\_value\_reported: 5.2', 'result\_unit\_reported: %')  
 511 ('study\_time\_collected: 114 Days', 'name\_reported: HEMOGLOBIN',  
 512 'result\_value\_reported: 15.5', 'result\_unit\_reported: g/dL')  
 513 ('study\_time\_collected: 114 Days', 'name\_reported: RBC', 'result\_value\_reported: 5.45',  
 514 'result\_unit\_reported: 10\*6 cells/uL')  
 515 ('study\_time\_collected: 114 Days', 'name\_reported: MCV', 'result\_value\_reported: 85',  
 516 'result\_unit\_reported: um\*3')  
 517 ('study\_time\_collected: 140 Days', 'name\_reported: MCV', 'result\_value\_reported: 84',  
 518 'result\_unit\_reported: um\*3')  
 519 ('study\_time\_collected: 140 Days', 'name\_reported: HEMOGLOBIN',  
 520 'result\_value\_reported: 15.1', 'result\_unit\_reported: g/dL')  
 521 ('study\_time\_collected: 140 Days', 'name\_reported: LARGE UNCLASSIFIED CELLS',  
 522 'result\_value\_reported: 0.9', 'result\_unit\_reported: NULL')  
 523 ('study\_time\_collected: 140 Days', 'name\_reported: BASOPHILS',  
 524 'result\_value\_reported: 0.4', 'result\_unit\_reported: %')

525 ('study\_time\_collected: 140 Days', 'name\_reported: MONOCYTES',  
 526 'result\_value\_reported: 3.5', 'result\_unit\_reported: %')  
 527 ('study\_time\_collected: 140 Days', 'name\_reported: WBC', 'result\_value\_reported: 12.7',  
 528 'result\_unit\_reported: 10\*3 cells/uL')  
 529 ('study\_time\_collected: 140 Days', 'name\_reported: MCH', 'result\_value\_reported: 29',  
 530 'result\_unit\_reported: %')  
 531 ('study\_time\_collected: 140 Days', 'name\_reported: EOSINOPHILS',  
 532 'result\_value\_reported: 0.5', 'result\_unit\_reported: %')  
 533 ('study\_time\_collected: 140 Days', 'name\_reported: MCHC', 'result\_value\_reported: 34',  
 534 'result\_unit\_reported: %')  
 535 ('study\_time\_collected: 140 Days', 'name\_reported: SEGMENTED NEUTROPHILS',  
 536 'result\_value\_reported: 77.8', 'result\_unit\_reported: %')  
 537 ('study\_time\_collected: 140 Days', 'name\_reported: HEMATOCRIT',  
 538 'result\_value\_reported: 44', 'result\_unit\_reported: %')  
 539 ('study\_time\_collected: 140 Days', 'name\_reported: PLATELET COUNT',  
 540 'result\_value\_reported: 275', 'result\_unit\_reported: 10\*3 cells/uL')  
 541 ('study\_time\_collected: 140 Days', 'name\_reported: LYMPHOCYTES',  
 542 'result\_value\_reported: 16.9', 'result\_unit\_reported: %')  
 543 ('study\_time\_collected: 140 Days', 'name\_reported: RBC', 'result\_value\_reported: 5.26',  
 544 'result\_unit\_reported: 10\*6 cells/uL')  
 545 ('study\_time\_collected: 155 Days', 'name\_reported: MCV', 'result\_value\_reported: 84',  
 546 'result\_unit\_reported: um\*3')  
 547 ('study\_time\_collected: 155 Days', 'name\_reported: MONOCYTES',  
 548 'result\_value\_reported: 4.8', 'result\_unit\_reported: %')  
 549 ('study\_time\_collected: 155 Days', 'name\_reported: HEMATOCRIT',  
 550 'result\_value\_reported: 44', 'result\_unit\_reported: %')  
 551 ('study\_time\_collected: 155 Days', 'name\_reported: PLATELET COUNT',  
 552 'result\_value\_reported: 286', 'result\_unit\_reported: 10\*3 cells/uL')  
 553 ('study\_time\_collected: 155 Days', 'name\_reported: LYMPHOCYTES',  
 554 'result\_value\_reported: 33.3', 'result\_unit\_reported: %')  
 555 ('study\_time\_collected: 155 Days', 'name\_reported: MCH', 'result\_value\_reported: 30',  
 556 'result\_unit\_reported: %')  
 557 ('study\_time\_collected: 155 Days', 'name\_reported: LARGE UNCLASSIFIED CELLS',  
 558 'result\_value\_reported: 1.7', 'result\_unit\_reported: NULL')  
 559 ('study\_time\_collected: 155 Days', 'name\_reported: HEMOGLOBIN',  
 560 'result\_value\_reported: 15.7', 'result\_unit\_reported: g/dL')  
 561 ('study\_time\_collected: 155 Days', 'name\_reported: BASOPHILS',  
 562 'result\_value\_reported: 0.9', 'result\_unit\_reported: %')  
 563 ('study\_time\_collected: 155 Days', 'name\_reported: WBC', 'result\_value\_reported: 7.2',  
 564 'result\_unit\_reported: 10\*3 cells/uL')  
 565 ('study\_time\_collected: 155 Days', 'name\_reported: EOSINOPHILS',  
 566 'result\_value\_reported: 2.4', 'result\_unit\_reported: %')  
 567 ('study\_time\_collected: 155 Days', 'name\_reported: SEGMENTED NEUTROPHILS',  
 568 'result\_value\_reported: 56.9', 'result\_unit\_reported: %')  
 569 ('study\_time\_collected: 155 Days', 'name\_reported: RBC', 'result\_value\_reported: 5.21',  
 570 'result\_unit\_reported: 10\*6 cells/uL')

571 ('study\_time\_collected: 155 Days', 'name\_reported: MCHC', 'result\_value\_reported: 36',  
 572 'result\_unit\_reported: %')  
 573 ('study\_time\_collected: 28 Days', 'name\_reported: SEGMENTED NEUTROPHILS',  
 574 'result\_value\_reported: 64.3', 'result\_unit\_reported: %')  
 575 ('study\_time\_collected: 28 Days', 'name\_reported: HEMOGLOBIN',  
 576 'result\_value\_reported: 15.8', 'result\_unit\_reported: g/dL')  
 577 ('study\_time\_collected: 28 Days', 'name\_reported: LARGE UNCLASSIFIED CELLS',  
 578 'result\_value\_reported: 1.7', 'result\_unit\_reported: NULL')  
 579 ('study\_time\_collected: 28 Days', 'name\_reported: RBC', 'result\_value\_reported: 5.44',  
 580 'result\_unit\_reported: 10\*6 cells/uL')  
 581 ('study\_time\_collected: 28 Days', 'name\_reported: MCV', 'result\_value\_reported: 87',  
 582 'result\_unit\_reported: um\*3')  
 583 ('study\_time\_collected: 28 Days', 'name\_reported: BASOPHILS', 'result\_value\_reported:  
 584 0.7', 'result\_unit\_reported: %')  
 585 ('study\_time\_collected: 28 Days', 'name\_reported: MCHC', 'result\_value\_reported: 33',  
 586 'result\_unit\_reported: %')  
 587 ('study\_time\_collected: 28 Days', 'name\_reported: PLATELET COUNT',  
 588 'result\_value\_reported: 267', 'result\_unit\_reported: 10\*3 cells/uL')  
 589 ('study\_time\_collected: 28 Days', 'name\_reported: WBC', 'result\_value\_reported: 6.5',  
 590 'result\_unit\_reported: 10\*3 cells/uL')  
 591 ('study\_time\_collected: 28 Days', 'name\_reported: EOSINOPHILS',  
 592 'result\_value\_reported: 1.3', 'result\_unit\_reported: %')  
 593 ('study\_time\_collected: 28 Days', 'name\_reported: LYMPHOCYTES',  
 594 'result\_value\_reported: 29.2', 'result\_unit\_reported: %')  
 595 ('study\_time\_collected: 28 Days', 'name\_reported: HEMATOCRIT',  
 596 'result\_value\_reported: 47', 'result\_unit\_reported: %')  
 597 ('study\_time\_collected: 28 Days', 'name\_reported: MONOCYTES',  
 598 'result\_value\_reported: 3', 'result\_unit\_reported: %')  
 599 ('study\_time\_collected: 28 Days', 'name\_reported: MCH', 'result\_value\_reported: 29',  
 600 'result\_unit\_reported: %')  
 601 ('study\_time\_collected: 365 Days', 'name\_reported: MCHC', 'result\_value\_reported: 33',  
 602 'result\_unit\_reported: %')  
 603 ('study\_time\_collected: 365 Days', 'name\_reported: HEMOGLOBIN',  
 604 'result\_value\_reported: 15.1', 'result\_unit\_reported: g/dL')  
 605 ('study\_time\_collected: 365 Days', 'name\_reported: SEGMENTED NEUTROPHILS',  
 606 'result\_value\_reported: 52.8', 'result\_unit\_reported: %')  
 607 ('study\_time\_collected: 365 Days', 'name\_reported: LARGE UNCLASSIFIED CELLS',  
 608 'result\_value\_reported: 1.7', 'result\_unit\_reported: NULL')  
 609 ('study\_time\_collected: 365 Days', 'name\_reported: MCV', 'result\_value\_reported: 87',  
 610 'result\_unit\_reported: um\*3')  
 611 ('study\_time\_collected: 365 Days', 'name\_reported: MONOCYTES',  
 612 'result\_value\_reported: 6.2', 'result\_unit\_reported: %')  
 613 ('study\_time\_collected: 365 Days', 'name\_reported: RBC', 'result\_value\_reported: 5.19',  
 614 'result\_unit\_reported: 10\*6 cells/uL')  
 615 ('study\_time\_collected: 365 Days', 'name\_reported: HEMATOCRIT',  
 616 'result\_value\_reported: 45', 'result\_unit\_reported: %')

617 ('study\_time\_collected: 365 Days', 'name\_reported: EOSINOPHILS',  
 618 'result\_value\_reported: 2.7', 'result\_unit\_reported: %')  
 619 ('study\_time\_collected: 365 Days', 'name\_reported: LYMPHOCYTES',  
 620 'result\_value\_reported: 36.3', 'result\_unit\_reported: %')  
 621 ('study\_time\_collected: 365 Days', 'name\_reported: MCH', 'result\_value\_reported: 29',  
 622 'result\_unit\_reported: %')  
 623 ('study\_time\_collected: 365 Days', 'name\_reported: WBC', 'result\_value\_reported: 5.9',  
 624 'result\_unit\_reported: 10\*3 cells/uL')  
 625 ('study\_time\_collected: 365 Days', 'name\_reported: BASOPHILS',  
 626 'result\_value\_reported: 0.3', 'result\_unit\_reported: %')  
 627 ('study\_time\_collected: 365 Days', 'name\_reported: PLATELET COUNT',  
 628 'result\_value\_reported: 252', 'result\_unit\_reported: 10\*3 cells/uL')  
 629 ('study\_time\_collected: 56 Days', 'name\_reported: RBC', 'result\_value\_reported: 5.17',  
 630 'result\_unit\_reported: 10\*6 cells/uL')  
 631 ('study\_time\_collected: 56 Days', 'name\_reported: SEGMENTED NEUTROPHILS',  
 632 'result\_value\_reported: 58.9', 'result\_unit\_reported: %')  
 633 ('study\_time\_collected: 56 Days', 'name\_reported: PLATELET COUNT',  
 634 'result\_value\_reported: 270', 'result\_unit\_reported: 10\*3 cells/uL')  
 635 ('study\_time\_collected: 56 Days', 'name\_reported: MCH', 'result\_value\_reported: 30',  
 636 'result\_unit\_reported: %')  
 637 ('study\_time\_collected: 56 Days', 'name\_reported: BASOPHILS', 'result\_value\_reported:  
 638 0.7', 'result\_unit\_reported: %')  
 639 ('study\_time\_collected: 56 Days', 'name\_reported: LARGE UNCLASSIFIED CELLS',  
 640 'result\_value\_reported: 1.6', 'result\_unit\_reported: NULL')  
 641 ('study\_time\_collected: 56 Days', 'name\_reported: MCHC', 'result\_value\_reported: 35',  
 642 'result\_unit\_reported: %')  
 643 ('study\_time\_collected: 56 Days', 'name\_reported: EOSINOPHILS',  
 644 'result\_value\_reported: 1.7', 'result\_unit\_reported: %')  
 645 ('study\_time\_collected: 56 Days', 'name\_reported: HEMATOCRIT',  
 646 'result\_value\_reported: 44', 'result\_unit\_reported: %')  
 647 ('study\_time\_collected: 56 Days', 'name\_reported: MCV', 'result\_value\_reported: 86',  
 648 'result\_unit\_reported: um\*3')  
 649 ('study\_time\_collected: 56 Days', 'name\_reported: WBC', 'result\_value\_reported: 6.8',  
 650 'result\_unit\_reported: 10\*3 cells/uL')  
 651 ('study\_time\_collected: 56 Days', 'name\_reported: MONOCYTES',  
 652 'result\_value\_reported: 4.3', 'result\_unit\_reported: %')  
 653 ('study\_time\_collected: 56 Days', 'name\_reported: LYMPHOCYTES',  
 654 'result\_value\_reported: 32.8', 'result\_unit\_reported: %')  
 655 ('study\_time\_collected: 56 Days', 'name\_reported: HEMOGLOBIN',  
 656 'result\_value\_reported: 15.3', 'result\_unit\_reported: g/dL')  
 657 ('study\_time\_collected: 87 Days', 'name\_reported: WBC', 'result\_value\_reported: 6.9',  
 658 'result\_unit\_reported: 10\*3 cells/uL')  
 659 ('study\_time\_collected: 87 Days', 'name\_reported: RBC', 'result\_value\_reported: 5.21',  
 660 'result\_unit\_reported: 10\*6 cells/uL')  
 661 ('study\_time\_collected: 87 Days', 'name\_reported: MCH', 'result\_value\_reported: 29',  
 662 'result\_unit\_reported: %')

663 ('study\_time\_collected: 87 Days', 'name\_reported: EOSINOPHILS',  
 664 'result\_value\_reported: 1.5', 'result\_unit\_reported: %')  
 665 ('study\_time\_collected: 87 Days', 'name\_reported: LYMPHOCYTES',  
 666 'result\_value\_reported: 39.1', 'result\_unit\_reported: %')  
 667 ('study\_time\_collected: 87 Days', 'name\_reported: MCV', 'result\_value\_reported: 84',  
 668 'result\_unit\_reported: um\*3')  
 669 ('study\_time\_collected: 87 Days', 'name\_reported: SEGMENTED NEUTROPHILS',  
 670 'result\_value\_reported: 51.6', 'result\_unit\_reported: %')  
 671 ('study\_time\_collected: 87 Days', 'name\_reported: LARGE UNCLASSIFIED CELLS',  
 672 'result\_value\_reported: 1.8', 'result\_unit\_reported: NULL')  
 673 ('study\_time\_collected: 87 Days', 'name\_reported: HEMOGLOBIN',  
 674 'result\_value\_reported: 14.9', 'result\_unit\_reported: g/dL')  
 675 ('study\_time\_collected: 87 Days', 'name\_reported: PLATELET COUNT',  
 676 'result\_value\_reported: 238', 'result\_unit\_reported: 10\*3 cells/uL')  
 677 ('study\_time\_collected: 87 Days', 'name\_reported: HEMATOCRIT',  
 678 'result\_value\_reported: 44', 'result\_unit\_reported: %')  
 679 ('study\_time\_collected: 87 Days', 'name\_reported: BASOPHILS', 'result\_value\_reported:  
 680 0.5', 'result\_unit\_reported: %')  
 681 ('study\_time\_collected: 87 Days', 'name\_reported: MCHC', 'result\_value\_reported: 34',  
 682 'result\_unit\_reported: %')  
 683 ('study\_time\_collected: 87 Days', 'name\_reported: MONOCYTES',  
 684 'result\_value\_reported: 5.5', 'result\_unit\_reported: %')  
 685  
 686 Assay Measurements  
 687 ('study\_time\_collected: 100', 'analyte: IgG-a Ragweed', 'value\_reported: 2307',  
 688 'unit\_reported: ng/ml')  
 689 ('study\_time\_collected: 100', 'analyte: IgE-a Amb a', 'value\_reported: 2631.5',  
 690 'unit\_reported: U/ml')  
 691 ('study\_time\_collected: 100', 'analyte: IgG-a Amb a', 'value\_reported: 4979.2',  
 692 'unit\_reported: U/ml')  
 693 ('study\_time\_collected: 100', 'analyte: Free IgE Concentration', 'value\_reported: 21.967',  
 694 'unit\_reported: ng/ml')  
 695 ('study\_time\_collected: 100', 'analyte: IgE-a Ragweed', 'value\_reported: 47.9',  
 696 'unit\_reported: kIUa/ml')  
 697 ('study\_time\_collected: 66', 'analyte: Free IgE Concentration', 'value\_reported: 15.556',  
 698 'unit\_reported: ng/ml')  
 699 ('study\_time\_collected: 66', 'analyte: IgG-a Amb a', 'value\_reported: 390.3',  
 700 'unit\_reported: U/ml')  
 701 ('study\_time\_collected: 66', 'analyte: IgE-a Ragweed', 'value\_reported: 32.4',  
 702 'unit\_reported: kIUa/ml')  
 703 ('study\_time\_collected: 66', 'analyte: IgE-a Amb a', 'value\_reported: 670.9',  
 704 'unit\_reported: U/ml')  
 705 ('study\_time\_collected: 66', 'analyte: IgG-a Ragweed', 'value\_reported: 100',  
 706 'unit\_reported: ng/ml')  
 707 ('study\_time\_collected: 73', 'analyte: Free IgE Concentration', 'value\_reported: 19.712',  
 708 'unit\_reported: ng/ml')

709 ('study\_time\_collected: 73', 'analyte: IgE-a Amb a', 'value\_reported: 1005.5',  
710 'unit\_reported: U/ml')  
711 ('study\_time\_collected: 73', 'analyte: IgG-a Amb a', 'value\_reported: 659.7',  
712 'unit\_reported: U/ml')  
713 ('study\_time\_collected: 73', 'analyte: IgE-a Ragweed', 'value\_reported: 41', 'unit\_reported:  
714 kIUa/ml')  
715 ('study\_time\_collected: 73', 'analyte: IgG-a Ragweed', 'value\_reported: 290',  
716 'unit\_reported: ng/ml')

717

#### 718 Adverse Reactions

719 Parotid duct cyst  
720 Chest tightness  
721 Injection site reaction NOS  
722 Cough  
723 Sinus congestion  
724 Injection site pruritus  
725 Dizziness  
726 Rash pruritic  
727 Sinus headache  
728 Injection site pruritus  
729 Blood creatine phosphokinase increased  
730 Blood pressure decreased  
731 Bursitis  
732 Lower respiratory tract infection NOS  
733 Bronchitis NOS  
734 Nasopharyngitis  
735 Sinusitis NOS  
736 Throat tightness  
737 Injection site pruritus  
738 Dermatitis atopic

739

740

741

742

743

744

745

746

747

748

749

750

751

752

753

754

755 **Supplementary Note 3**

756

757 Subject: SUB73491

758 verification code: 741be0d4c0

759 Meta Information

760 race: Black or African American

761 gender: Male

762 age\_reported: 28

763 arm\_accession: ARM3

764 Blood Tests

765 ('study\_time\_collected: -20 Days', 'name\_reported: MCV', '90', 'um\*3')

766 ('study\_time\_collected: -20 Days', 'name\_reported: WBC', '7.2', '10\*3 cells/uL')

767 ('study\_time\_collected: -20 Days', 'name\_reported: MONOCYTES', '5.4', '%')

768 ('study\_time\_collected: -20 Days', 'name\_reported: MCHC', '34', '%')

769 ('study\_time\_collected: -20 Days', 'name\_reported: RBC', '4.71', '10\*6 cells/uL')

770 ('study\_time\_collected: -20 Days', 'name\_reported: BASOPHILS', '0.2', '%')

771 ('study\_time\_collected: -20 Days', 'name\_reported: MCH', '30', '%')

772 ('study\_time\_collected: -20 Days', 'name\_reported: Total IgE', '34', 'unknown')

773 ('study\_time\_collected: -20 Days', 'name\_reported: HEMOGLOBIN', '14.1', 'g/dL')

774 ('study\_time\_collected: -20 Days', 'name\_reported: SEGMENTED NEUTROPHILS',  
775 '52.7', '%')

776 ('study\_time\_collected: -20 Days', 'name\_reported: LYMPHOCYTES', '37.1', '%')

777 ('study\_time\_collected: -20 Days', 'name\_reported: HEMATOCRIT', '42', '%')

778 ('study\_time\_collected: -20 Days', 'name\_reported: LARGE UNCLASSIFIED CELLS',  
779 '3.4', 'NULL')

780 ('study\_time\_collected: -20 Days', 'name\_reported: EOSINOPHILS', '1.7', '%')

781 ('study\_time\_collected: -20 Days', 'name\_reported: PLATELET COUNT', '194', '10\*3  
782 cells/uL')

783 ('study\_time\_collected: 0 Days', 'name\_reported: EOSINOPHILS', '4.6', '%')

784 ('study\_time\_collected: 0 Days', 'name\_reported: RBC', '4.45', '10\*6 cells/uL')

785 ('study\_time\_collected: 0 Days', 'name\_reported: PLATELET COUNT', '223', '10\*3  
786 cells/uL')

787 ('study\_time\_collected: 0 Days', 'name\_reported: HEMATOCRIT', '41', '%')

788 ('study\_time\_collected: 0 Days', 'name\_reported: MCV', '92', 'um\*3')

789 ('study\_time\_collected: 0 Days', 'name\_reported: MCHC', '33', '%')

790 ('study\_time\_collected: 0 Days', 'name\_reported: BASOPHILS', '0.4', '%')

791 ('study\_time\_collected: 0 Days', 'name\_reported: HEMOGLOBIN', '13.5', 'g/dL')

792 ('study\_time\_collected: 0 Days', 'name\_reported: MCH', '30', '%')

793 ('study\_time\_collected: 0 Days', 'name\_reported: MONOCYTES', '6.6', '%')

794 ('study\_time\_collected: 0 Days', 'name\_reported: LYMPHOCYTES', '41.2', '%')

795 ('study\_time\_collected: 0 Days', 'name\_reported: WBC', '5.9', '10\*3 cells/uL')

796 ('study\_time\_collected: 0 Days', 'name\_reported: BANDS', '0', '%')

797 ('study\_time\_collected: 0 Days', 'name\_reported: SEGMENTED NEUTROPHILS', '44.4',  
798 '%')

799 ('study\_time\_collected: 0 Days', 'name\_reported: LARGE UNCLASSIFIED CELLS',  
800 '2.8', 'NULL')

801 ('study\_time\_collected: 119 Days', 'name\_reported: LYMPHOCYTES', '38.1', '%')  
 802 ('study\_time\_collected: 119 Days', 'name\_reported: WBC', '5.4', '10\*3 cells/uL')  
 803 ('study\_time\_collected: 119 Days', 'name\_reported: RBC', '4.55', '10\*6 cells/uL')  
 804 ('study\_time\_collected: 119 Days', 'name\_reported: MCHC', '34', '%')  
 805 ('study\_time\_collected: 119 Days', 'name\_reported: MCV', '88', 'um\*3')  
 806 ('study\_time\_collected: 119 Days', 'name\_reported: PLATELET COUNT', '189', '10\*3  
 807 cells/uL')  
 808 ('study\_time\_collected: 119 Days', 'name\_reported: SEGMENTED NEUTROPHILS',  
 809 '50.2', '%')  
 810 ('study\_time\_collected: 119 Days', 'name\_reported: MONOCYTES', '6.2', '%')  
 811 ('study\_time\_collected: 119 Days', 'name\_reported: HEMOGLOBIN', '13.7', 'g/dL')  
 812 ('study\_time\_collected: 119 Days', 'name\_reported: EOSINOPHILS', '2.4', '%')  
 813 ('study\_time\_collected: 119 Days', 'name\_reported: LARGE UNCLASSIFIED CELLS',  
 814 '2.6', 'NULL')  
 815 ('study\_time\_collected: 119 Days', 'name\_reported: MCH', '30', '%')  
 816 ('study\_time\_collected: 119 Days', 'name\_reported: BASOPHILS', '0.5', '%')  
 817 ('study\_time\_collected: 119 Days', 'name\_reported: HEMATOCRIT', '40', '%')  
 818 ('study\_time\_collected: 147 Days', 'name\_reported: MCH', '30', '%')  
 819 ('study\_time\_collected: 147 Days', 'name\_reported: HEMOGLOBIN', '13.7', 'g/dL')  
 820 ('study\_time\_collected: 147 Days', 'name\_reported: HEMATOCRIT', '41', '%')  
 821 ('study\_time\_collected: 147 Days', 'name\_reported: MCV', '90', 'um\*3')  
 822 ('study\_time\_collected: 147 Days', 'name\_reported: EOSINOPHILS', '2.6', '%')  
 823 ('study\_time\_collected: 147 Days', 'name\_reported: LARGE UNCLASSIFIED CELLS',  
 824 '2.4', 'NULL')  
 825 ('study\_time\_collected: 147 Days', 'name\_reported: SEGMENTED NEUTROPHILS',  
 826 '54.2', '%')  
 827 ('study\_time\_collected: 147 Days', 'name\_reported: MONOCYTES', '6.5', '%')  
 828 ('study\_time\_collected: 147 Days', 'name\_reported: RBC', '4.51', '10\*6 cells/uL')  
 829 ('study\_time\_collected: 147 Days', 'name\_reported: PLATELET COUNT', '203', '10\*3  
 830 cells/uL')  
 831 ('study\_time\_collected: 147 Days', 'name\_reported: WBC', '6.9', '10\*3 cells/uL')  
 832 ('study\_time\_collected: 147 Days', 'name\_reported: LYMPHOCYTES', '34', '%')  
 833 ('study\_time\_collected: 147 Days', 'name\_reported: MCHC', '34', '%')  
 834 ('study\_time\_collected: 147 Days', 'name\_reported: BASOPHILS', '0.3', '%')  
 835 ('study\_time\_collected: 160 Days', 'name\_reported: RBC', '4.29', '10\*6 cells/uL')  
 836 ('study\_time\_collected: 160 Days', 'name\_reported: MONOCYTES', '7.3', '%')  
 837 ('study\_time\_collected: 160 Days', 'name\_reported: HEMATOCRIT', '39', '%')  
 838 ('study\_time\_collected: 160 Days', 'name\_reported: MCHC', '34', '%')  
 839 ('study\_time\_collected: 160 Days', 'name\_reported: LYMPHOCYTES', '37', '%')  
 840 ('study\_time\_collected: 160 Days', 'name\_reported: MCH', '31', '%')  
 841 ('study\_time\_collected: 160 Days', 'name\_reported: HEMOGLOBIN', '13.3', 'g/dL')  
 842 ('study\_time\_collected: 160 Days', 'name\_reported: BASOPHILS', '0.3', '%')  
 843 ('study\_time\_collected: 160 Days', 'name\_reported: EOSINOPHILS', '2.8', '%')  
 844 ('study\_time\_collected: 160 Days', 'name\_reported: LARGE UNCLASSIFIED CELLS',  
 845 '2.9', 'NULL')  
 846 ('study\_time\_collected: 160 Days', 'name\_reported: WBC', '4.7', '10\*3 cells/uL')

847 ('study\_time\_collected: 160 Days', 'name\_reported: PLATELET COUNT', '198', '10\*3  
 848 cells/uL')  
 849 ('study\_time\_collected: 160 Days', 'name\_reported: MCV', '90', 'um\*3')  
 850 ('study\_time\_collected: 160 Days', 'name\_reported: SEGMENTED NEUTROPHILS',  
 851 '49.7', '%')  
 852 ('study\_time\_collected: 28 Days', 'name\_reported: WBC', '6.2', '10\*3 cells/uL')  
 853 ('study\_time\_collected: 28 Days', 'name\_reported: BASOPHILS', '0', '%')  
 854 ('study\_time\_collected: 28 Days', 'name\_reported: BANDS', '4', '%')  
 855 ('study\_time\_collected: 28 Days', 'name\_reported: PLATELET COUNT', '235', '10\*3  
 856 cells/uL')  
 857 ('study\_time\_collected: 28 Days', 'name\_reported: LYMPHOCYTES', '49', '%')  
 858 ('study\_time\_collected: 28 Days', 'name\_reported: MCHC', '33', '%')  
 859 ('study\_time\_collected: 28 Days', 'name\_reported: EOSINOPHILS', '0', '%')  
 860 ('study\_time\_collected: 28 Days', 'name\_reported: SEGMENTED NEUTROPHILS', '43',  
 861 '%')  
 862 ('study\_time\_collected: 28 Days', 'name\_reported: HEMATOCRIT', '43', '%')  
 863 ('study\_time\_collected: 28 Days', 'name\_reported: MCV', '91', 'um\*3')  
 864 ('study\_time\_collected: 28 Days', 'name\_reported: RBC', '4.68', '10\*6 cells/uL')  
 865 ('study\_time\_collected: 28 Days', 'name\_reported: MCH', '30', '%')  
 866 ('study\_time\_collected: 28 Days', 'name\_reported: HEMOGLOBIN', '14.2', 'g/dL')  
 867 ('study\_time\_collected: 28 Days', 'name\_reported: MONOCYTES', '4', '%')  
 868 ('study\_time\_collected: 369 Days', 'name\_reported: BASOPHILS', '0.3', '%')  
 869 ('study\_time\_collected: 369 Days', 'name\_reported: SEGMENTED NEUTROPHILS',  
 870 '47.7', '%')  
 871 ('study\_time\_collected: 369 Days', 'name\_reported: LYMPHOCYTES', '39.5', '%')  
 872 ('study\_time\_collected: 369 Days', 'name\_reported: EOSINOPHILS', '2.3', '%')  
 873 ('study\_time\_collected: 369 Days', 'name\_reported: HEMOGLOBIN', '14.4', 'g/dL')  
 874 ('study\_time\_collected: 369 Days', 'name\_reported: LARGE UNCLASSIFIED CELLS',  
 875 '2.8', 'NULL')  
 876 ('study\_time\_collected: 369 Days', 'name\_reported: HEMATOCRIT', '42', '%')  
 877 ('study\_time\_collected: 369 Days', 'name\_reported: MCH', '31', '%')  
 878 ('study\_time\_collected: 369 Days', 'name\_reported: MONOCYTES', '7.4', '%')  
 879 ('study\_time\_collected: 369 Days', 'name\_reported: MCV', '91', 'um\*3')  
 880 ('study\_time\_collected: 369 Days', 'name\_reported: MCHC', '34', '%')  
 881 ('study\_time\_collected: 369 Days', 'name\_reported: RBC', '4.62', '10\*6 cells/uL')  
 882 ('study\_time\_collected: 369 Days', 'name\_reported: WBC', '5.2', '10\*3 cells/uL')  
 883 ('study\_time\_collected: 369 Days', 'name\_reported: PLATELET COUNT', '179', '10\*3  
 884 cells/uL')  
 885 ('study\_time\_collected: 56 Days', 'name\_reported: BANDS', '1', '%')  
 886 ('study\_time\_collected: 56 Days', 'name\_reported: MCV', '90', 'um\*3')  
 887 ('study\_time\_collected: 56 Days', 'name\_reported: HEMATOCRIT', '43', '%')  
 888 ('study\_time\_collected: 56 Days', 'name\_reported: MONOCYTES', '9', '%')  
 889 ('study\_time\_collected: 56 Days', 'name\_reported: HEMOGLOBIN', '14.5', 'g/dL')  
 890 ('study\_time\_collected: 56 Days', 'name\_reported: BASOPHILS', '0', '%')  
 891 ('study\_time\_collected: 56 Days', 'name\_reported: MCHC', '34', '%')  
 892 ('study\_time\_collected: 56 Days', 'name\_reported: RBC', '4.74', '10\*6 cells/uL')

893 ('study\_time\_collected: 56 Days', 'name\_reported: MCH', '31', '%')  
 894 ('study\_time\_collected: 56 Days', 'name\_reported: LYMPHOCYTES', '51', '%')  
 895 ('study\_time\_collected: 56 Days', 'name\_reported: PLATELET COUNT', '221', '10\*3  
 896 cells/uL')  
 897 ('study\_time\_collected: 56 Days', 'name\_reported: WBC', '6.7', '10\*3 cells/uL')  
 898 ('study\_time\_collected: 56 Days', 'name\_reported: SEGMENTED NEUTROPHILS', '39',  
 899 '%')  
 900 ('study\_time\_collected: 56 Days', 'name\_reported: EOSINOPHILS', '0', '%')  
 901 ('study\_time\_collected: 91 Days', 'name\_reported: BASOPHILS', '0.3', '%')  
 902 ('study\_time\_collected: 91 Days', 'name\_reported: LYMPHOCYTES', '30.3', '%')  
 903 ('study\_time\_collected: 91 Days', 'name\_reported: PLATELET COUNT', '199', '10\*3  
 904 cells/uL')  
 905 ('study\_time\_collected: 91 Days', 'name\_reported: MONOCYTES', '5.5', '%')  
 906 ('study\_time\_collected: 91 Days', 'name\_reported: EOSINOPHILS', '1.9', '%')  
 907 ('study\_time\_collected: 91 Days', 'name\_reported: SEGMENTED NEUTROPHILS',  
 908 '59.6', '%')  
 909 ('study\_time\_collected: 91 Days', 'name\_reported: MCHC', '35', '%')  
 910 ('study\_time\_collected: 91 Days', 'name\_reported: HEMOGLOBIN', '13.8', 'g/dL')  
 911 ('study\_time\_collected: 91 Days', 'name\_reported: LARGE UNCLASSIFIED CELLS',  
 912 '2.4', 'NULL')  
 913 ('study\_time\_collected: 91 Days', 'name\_reported: RBC', '4.53', '10\*6 cells/uL')  
 914 ('study\_time\_collected: 91 Days', 'name\_reported: MCH', '30', '%')  
 915 ('study\_time\_collected: 91 Days', 'name\_reported: MCV', '88', 'um\*3')  
 916 ('study\_time\_collected: 91 Days', 'name\_reported: HEMATOCRIT', '40', '%')  
 917 ('study\_time\_collected: 91 Days', 'name\_reported: WBC', '6.8', '10\*3 cells/uL')  
 918

919 Assay Measurements

920 ('study\_time\_collected: -8', 'analyte: IgE-a Amb a', '28.3', 'U/ml')  
 921 ('study\_time\_collected: -8', 'analyte: IgG-a Amb a', '43', 'U/ml')  
 922 ('study\_time\_collected: -8', 'analyte: IgE-a Ragweed', '1.71', 'kIUa/ml')  
 923 ('study\_time\_collected: -8', 'analyte: Free IgE Concentration', '89.92', 'ng/ml')  
 924 ('study\_time\_collected: -8', 'analyte: IgG-a Ragweed', '100', 'ng/ml')  
 925 ('study\_time\_collected: 105', 'analyte: IgG-a Amb a', '511.5', 'U/ml')  
 926 ('study\_time\_collected: 105', 'analyte: IgE-a Amb a', '3340', 'U/ml')  
 927 ('study\_time\_collected: 105', 'analyte: IgE-a Ragweed', '71.1', 'kIUa/ml')  
 928 ('study\_time\_collected: 105', 'analyte: Free IgE Concentration', '17.376', 'ng/ml')  
 929 ('study\_time\_collected: 105', 'analyte: IgG-a Ragweed', '385', 'ng/ml')  
 930 ('study\_time\_collected: 202', 'analyte: Free IgE Concentration', '34.303', 'ng/ml')  
 931 ('study\_time\_collected: 202', 'analyte: IgE-a Ragweed', '45.6', 'kIUa/ml')  
 932 ('study\_time\_collected: 202', 'analyte: IgG-a Ragweed', '377', 'ng/ml')  
 933 ('study\_time\_collected: 202', 'analyte: IgG-a Amb a', '398', 'U/ml')  
 934 ('study\_time\_collected: 202', 'analyte: IgE-a Amb a', '2195', 'U/ml')  
 935

936 Adverse Reactions

937 None  
 938

939 **Supplementary Note 4**

940

941 Subject: SUB73511

942 verification code: d3feabcf82

943 Meta Information

944 race: White

945 gender: Male

946 age\_reported: 45

947 arm\_accession: ARM4

948 Blood Tests

949 ('study\_time\_collected: -15 Days', 'name\_reported: RBC', '5.45', '10\*6 cells/uL')

950 ('study\_time\_collected: -15 Days', 'name\_reported: HEMATOCRIT', '47', '%')

951 ('study\_time\_collected: -15 Days', 'name\_reported: PLATELET COUNT', '271', '10\*3  
952 cells/uL')

953 ('study\_time\_collected: -15 Days', 'name\_reported: WBC', '6.7', '10\*3 cells/uL')

954 ('study\_time\_collected: -15 Days', 'name\_reported: HEMOGLOBIN', '15.8', 'g/dL')

955 ('study\_time\_collected: -15 Days', 'name\_reported: MCV', '86', 'um\*3')

956 ('study\_time\_collected: -15 Days', 'name\_reported: Total IgE', '58', 'unknown')

957 ('study\_time\_collected: -15 Days', 'name\_reported: MCHC', '34', '%')

958 ('study\_time\_collected: -15 Days', 'name\_reported: MCH', '29', '%')

959 ('study\_time\_collected: 0 Days', 'name\_reported: LARGE UNCLASSIFIED CELLS',  
960 '2.2', 'NULL')

961 ('study\_time\_collected: 0 Days', 'name\_reported: MONOCYTES', '4.5', '%')

962 ('study\_time\_collected: 0 Days', 'name\_reported: HEMOGLOBIN', '14.8', 'g/dL')

963 ('study\_time\_collected: 0 Days', 'name\_reported: MCV', '87', 'um\*3')

964 ('study\_time\_collected: 0 Days', 'name\_reported: EOSINOPHILS', '1.9', '%')

965 ('study\_time\_collected: 0 Days', 'name\_reported: SEGMENTED NEUTROPHILS', '56.3',  
966 '%')

967 ('study\_time\_collected: 0 Days', 'name\_reported: HEMATOCRIT', '44', '%')

968 ('study\_time\_collected: 0 Days', 'name\_reported: WBC', '6.8', '10\*3 cells/uL')

969 ('study\_time\_collected: 0 Days', 'name\_reported: BASOPHILS', '0.6', '%')

970 ('study\_time\_collected: 0 Days', 'name\_reported: MCH', '29', '%')

971 ('study\_time\_collected: 0 Days', 'name\_reported: LYMPHOCYTES', '34.5', '%')

972 ('study\_time\_collected: 0 Days', 'name\_reported: MCHC', '34', '%')

973 ('study\_time\_collected: 0 Days', 'name\_reported: RBC', '5.09', '10\*6 cells/uL')

974 ('study\_time\_collected: 0 Days', 'name\_reported: PLATELET COUNT', '295', '10\*3  
975 cells/uL')

976 ('study\_time\_collected: 114 Days', 'name\_reported: LARGE UNCLASSIFIED CELLS',  
977 '2.4', 'NULL')

978 ('study\_time\_collected: 114 Days', 'name\_reported: PLATELET COUNT', '278', '10\*3  
979 cells/uL')

980 ('study\_time\_collected: 114 Days', 'name\_reported: HEMATOCRIT', '46', '%')

981 ('study\_time\_collected: 114 Days', 'name\_reported: BASOPHILS', '0.6', '%')

982 ('study\_time\_collected: 114 Days', 'name\_reported: SEGMENTED NEUTROPHILS',  
983 '57.3', '%')

984 ('study\_time\_collected: 114 Days', 'name\_reported: EOSINOPHILS', '2', '%')

985 ('study\_time\_collected: 114 Days', 'name\_reported: LYMPHOCYTES', '32.5', '%')  
 986 ('study\_time\_collected: 114 Days', 'name\_reported: MCH', '29', '%')  
 987 ('study\_time\_collected: 114 Days', 'name\_reported: MCHC', '34', '%')  
 988 ('study\_time\_collected: 114 Days', 'name\_reported: WBC', '7.3', '10\*3 cells/uL')  
 989 ('study\_time\_collected: 114 Days', 'name\_reported: MONOCYTES', '5.2', '%')  
 990 ('study\_time\_collected: 114 Days', 'name\_reported: HEMOGLOBIN', '15.5', 'g/dL')  
 991 ('study\_time\_collected: 114 Days', 'name\_reported: RBC', '5.45', '10\*6 cells/uL')  
 992 ('study\_time\_collected: 114 Days', 'name\_reported: MCV', '85', 'um\*3')  
 993 ('study\_time\_collected: 140 Days', 'name\_reported: MCV', '84', 'um\*3')  
 994 ('study\_time\_collected: 140 Days', 'name\_reported: HEMOGLOBIN', '15.1', 'g/dL')  
 995 ('study\_time\_collected: 140 Days', 'name\_reported: LARGE UNCLASSIFIED CELLS',  
 996 '0.9', 'NULL')  
 997 ('study\_time\_collected: 140 Days', 'name\_reported: BASOPHILS', '0.4', '%')  
 998 ('study\_time\_collected: 140 Days', 'name\_reported: MONOCYTES', '3.5', '%')  
 999 ('study\_time\_collected: 140 Days', 'name\_reported: WBC', '12.7', '10\*3 cells/uL')  
 1000 ('study\_time\_collected: 140 Days', 'name\_reported: MCH', '29', '%')  
 1001 ('study\_time\_collected: 140 Days', 'name\_reported: EOSINOPHILS', '0.5', '%')  
 1002 ('study\_time\_collected: 140 Days', 'name\_reported: MCHC', '34', '%')  
 1003 ('study\_time\_collected: 140 Days', 'name\_reported: SEGMENTED NEUTROPHILS',  
 1004 '77.8', '%')  
 1005 ('study\_time\_collected: 140 Days', 'name\_reported: HEMATOCRIT', '44', '%')  
 1006 ('study\_time\_collected: 140 Days', 'name\_reported: PLATELET COUNT', '275', '10\*3  
 1007 cells/uL')  
 1008 ('study\_time\_collected: 140 Days', 'name\_reported: LYMPHOCYTES', '16.9', '%')  
 1009 ('study\_time\_collected: 140 Days', 'name\_reported: RBC', '5.26', '10\*6 cells/uL')  
 1010 ('study\_time\_collected: 155 Days', 'name\_reported: MCV', '84', 'um\*3')  
 1011 ('study\_time\_collected: 155 Days', 'name\_reported: MONOCYTES', '4.8', '%')  
 1012 ('study\_time\_collected: 155 Days', 'name\_reported: HEMATOCRIT', '44', '%')  
 1013 ('study\_time\_collected: 155 Days', 'name\_reported: PLATELET COUNT', '286', '10\*3  
 1014 cells/uL')  
 1015 ('study\_time\_collected: 155 Days', 'name\_reported: LYMPHOCYTES', '33.3', '%')  
 1016 ('study\_time\_collected: 155 Days', 'name\_reported: MCH', '30', '%')  
 1017 ('study\_time\_collected: 155 Days', 'name\_reported: LARGE UNCLASSIFIED CELLS',  
 1018 '1.7', 'NULL')  
 1019 ('study\_time\_collected: 155 Days', 'name\_reported: HEMOGLOBIN', '15.7', 'g/dL')  
 1020 ('study\_time\_collected: 155 Days', 'name\_reported: BASOPHILS', '0.9', '%')  
 1021 ('study\_time\_collected: 155 Days', 'name\_reported: WBC', '7.2', '10\*3 cells/uL')  
 1022 ('study\_time\_collected: 155 Days', 'name\_reported: EOSINOPHILS', '2.4', '%')  
 1023 ('study\_time\_collected: 155 Days', 'name\_reported: SEGMENTED NEUTROPHILS',  
 1024 '56.9', '%')  
 1025 ('study\_time\_collected: 155 Days', 'name\_reported: RBC', '5.21', '10\*6 cells/uL')  
 1026 ('study\_time\_collected: 155 Days', 'name\_reported: MCHC', '36', '%')  
 1027 ('study\_time\_collected: 28 Days', 'name\_reported: SEGMENTED NEUTROPHILS',  
 1028 '64.3', '%')  
 1029 ('study\_time\_collected: 28 Days', 'name\_reported: HEMOGLOBIN', '15.8', 'g/dL')

1030 ('study\_time\_collected: 28 Days', 'name\_reported: LARGE UNCLASSIFIED CELLS',  
1031 '1.7', 'NULL')  
1032 ('study\_time\_collected: 28 Days', 'name\_reported: RBC', '5.44', '10\*6 cells/uL')  
1033 ('study\_time\_collected: 28 Days', 'name\_reported: MCV', '87', 'um\*3')  
1034 ('study\_time\_collected: 28 Days', 'name\_reported: BASOPHILS', '0.7', '%')  
1035 ('study\_time\_collected: 28 Days', 'name\_reported: MCHC', '33', '%')  
1036 ('study\_time\_collected: 28 Days', 'name\_reported: PLATELET COUNT', '267', '10\*3  
1037 cells/uL')  
1038 ('study\_time\_collected: 28 Days', 'name\_reported: WBC', '6.5', '10\*3 cells/uL')  
1039 ('study\_time\_collected: 28 Days', 'name\_reported: EOSINOPHILS', '1.3', '%')  
1040 ('study\_time\_collected: 28 Days', 'name\_reported: LYMPHOCYTES', '29.2', '%')  
1041 ('study\_time\_collected: 28 Days', 'name\_reported: HEMATOCRIT', '47', '%')  
1042 ('study\_time\_collected: 28 Days', 'name\_reported: MONOCYTES', '3', '%')  
1043 ('study\_time\_collected: 28 Days', 'name\_reported: MCH', '29', '%')  
1044 ('study\_time\_collected: 365 Days', 'name\_reported: MCHC', '33', '%')  
1045 ('study\_time\_collected: 365 Days', 'name\_reported: HEMOGLOBIN', '15.1', 'g/dL')  
1046 ('study\_time\_collected: 365 Days', 'name\_reported: SEGMENTED NEUTROPHILS',  
1047 '52.8', '%')  
1048 ('study\_time\_collected: 365 Days', 'name\_reported: LARGE UNCLASSIFIED CELLS',  
1049 '1.7', 'NULL')  
1050 ('study\_time\_collected: 365 Days', 'name\_reported: MCV', '87', 'um\*3')  
1051 ('study\_time\_collected: 365 Days', 'name\_reported: MONOCYTES', '6.2', '%')  
1052 ('study\_time\_collected: 365 Days', 'name\_reported: RBC', '5.19', '10\*6 cells/uL')  
1053 ('study\_time\_collected: 365 Days', 'name\_reported: HEMATOCRIT', '45', '%')  
1054 ('study\_time\_collected: 365 Days', 'name\_reported: EOSINOPHILS', '2.7', '%')  
1055 ('study\_time\_collected: 365 Days', 'name\_reported: LYMPHOCYTES', '36.3', '%')  
1056 ('study\_time\_collected: 365 Days', 'name\_reported: MCH', '29', '%')  
1057 ('study\_time\_collected: 365 Days', 'name\_reported: WBC', '5.9', '10\*3 cells/uL')  
1058 ('study\_time\_collected: 365 Days', 'name\_reported: BASOPHILS', '0.3', '%')  
1059 ('study\_time\_collected: 365 Days', 'name\_reported: PLATELET COUNT', '252', '10\*3  
1060 cells/uL')  
1061 ('study\_time\_collected: 56 Days', 'name\_reported: RBC', '5.17', '10\*6 cells/uL')  
1062 ('study\_time\_collected: 56 Days', 'name\_reported: SEGMENTED NEUTROPHILS',  
1063 '58.9', '%')  
1064 ('study\_time\_collected: 56 Days', 'name\_reported: PLATELET COUNT', '270', '10\*3  
1065 cells/uL')  
1066 ('study\_time\_collected: 56 Days', 'name\_reported: MCH', '30', '%')  
1067 ('study\_time\_collected: 56 Days', 'name\_reported: BASOPHILS', '0.7', '%')  
1068 ('study\_time\_collected: 56 Days', 'name\_reported: LARGE UNCLASSIFIED CELLS',  
1069 '1.6', 'NULL')  
1070 ('study\_time\_collected: 56 Days', 'name\_reported: MCHC', '35', '%')  
1071 ('study\_time\_collected: 56 Days', 'name\_reported: EOSINOPHILS', '1.7', '%')  
1072 ('study\_time\_collected: 56 Days', 'name\_reported: HEMATOCRIT', '44', '%')  
1073 ('study\_time\_collected: 56 Days', 'name\_reported: MCV', '86', 'um\*3')  
1074 ('study\_time\_collected: 56 Days', 'name\_reported: WBC', '6.8', '10\*3 cells/uL')  
1075 ('study\_time\_collected: 56 Days', 'name\_reported: MONOCYTES', '4.3', '%')

1076 ('study\_time\_collected: 56 Days', 'name\_reported: LYMPHOCYTES', '32.8', '%')  
1077 ('study\_time\_collected: 56 Days', 'name\_reported: HEMOGLOBIN', '15.3', 'g/dL')  
1078 ('study\_time\_collected: 87 Days', 'name\_reported: WBC', '6.9', '10\*3 cells/uL')  
1079 ('study\_time\_collected: 87 Days', 'name\_reported: RBC', '5.21', '10\*6 cells/uL')  
1080 ('study\_time\_collected: 87 Days', 'name\_reported: MCH', '29', '%')  
1081 ('study\_time\_collected: 87 Days', 'name\_reported: EOSINOPHILS', '1.5', '%')  
1082 ('study\_time\_collected: 87 Days', 'name\_reported: LYMPHOCYTES', '39.1', '%')  
1083 ('study\_time\_collected: 87 Days', 'name\_reported: MCV', '84', 'um\*3')  
1084 ('study\_time\_collected: 87 Days', 'name\_reported: SEGMENTED NEUTROPHILS',  
1085 '51.6', '%')  
1086 ('study\_time\_collected: 87 Days', 'name\_reported: LARGE UNCLASSIFIED CELLS',  
1087 '1.8', 'NULL')  
1088 ('study\_time\_collected: 87 Days', 'name\_reported: HEMOGLOBIN', '14.9', 'g/dL')  
1089 ('study\_time\_collected: 87 Days', 'name\_reported: PLATELET COUNT', '238', '10\*3  
1090 cells/uL')  
1091 ('study\_time\_collected: 87 Days', 'name\_reported: HEMATOCRIT', '44', '%')  
1092 ('study\_time\_collected: 87 Days', 'name\_reported: BASOPHILS', '0.5', '%')  
1093 ('study\_time\_collected: 87 Days', 'name\_reported: MCHC', '34', '%')  
1094 ('study\_time\_collected: 87 Days', 'name\_reported: MONOCYTES', '5.5', '%')

1095

#### 1096 Assay Measurements

1097 ('study\_time\_collected: 100', 'analyte: IgG-a Ragweed', '2307', 'ng/ml')  
1098 ('study\_time\_collected: 100', 'analyte: IgE-a Amb a', '2631.5', 'U/ml')  
1099 ('study\_time\_collected: 100', 'analyte: IgG-a Amb a', '4979.2', 'U/ml')  
1100 ('study\_time\_collected: 100', 'analyte: Free IgE Concentration', '21.967', 'ng/ml')  
1101 ('study\_time\_collected: 100', 'analyte: IgE-a Ragweed', '47.9', 'kIUa/ml')  
1102 ('study\_time\_collected: 66', 'analyte: Free IgE Concentration', '15.556', 'ng/ml')  
1103 ('study\_time\_collected: 66', 'analyte: IgG-a Amb a', '390.3', 'U/ml')  
1104 ('study\_time\_collected: 66', 'analyte: IgE-a Ragweed', '32.4', 'kIUa/ml')  
1105 ('study\_time\_collected: 66', 'analyte: IgE-a Amb a', '670.9', 'U/ml')  
1106 ('study\_time\_collected: 66', 'analyte: IgG-a Ragweed', '100', 'ng/ml')  
1107 ('study\_time\_collected: 73', 'analyte: Free IgE Concentration', '19.712', 'ng/ml')  
1108 ('study\_time\_collected: 73', 'analyte: IgE-a Amb a', '1005.5', 'U/ml')  
1109 ('study\_time\_collected: 73', 'analyte: IgG-a Amb a', '659.7', 'U/ml')  
1110 ('study\_time\_collected: 73', 'analyte: IgE-a Ragweed', '41', 'kIUa/ml')  
1111 ('study\_time\_collected: 73', 'analyte: IgG-a Ragweed', '290', 'ng/ml')

1112

#### 1113 Adverse Reactions

1114 None

1115
